# Supplementary material for: The Role of Diet Quality in Mediating the Association between Ultra-Processed Food Intake, Obesity and Health-Related Outcomes: A Review of Prospective Cohort Studies
Source: MDPI journal article supplement (doi:10.3390/nu14010023), 2021-12-22
Supplement: s1 [file s1]

## **Supplementary materials**

### **Review process**

Papers were included in the review if: they were prospective studies examining the impact of UPF intake (defined by the NOVA classification) on any health-related outcome, and also performed any form of diet or energy adjustment in their modelling analyses. Papers were excluded if they were cross-sectional in nature, retrospective, or did not include any form of diet or energy adjustment in their modelling to determine the association between UPF and the health-related outcome.

Prospective studies were obtained for the review via searches on PubMed for “ultraprocessed”, and “(ultraprocessed) AND ((Prospective) OR (Longitudinal))”. All item titles were reviewed and relevant abstracts were screened. Full papers were then accessed and included or excluded from the review based on the above criteria. Searches through references of systematic and narrative reviews of UPF and health outcomes were also performed, as well as searches through references of prospective studies.

All prospective studies examining the impact of UPF intake (defined by the NOVA classification) on any health-related outcome, whether or not they performed any form of diet or energy adjustment in their modelling analyses from the search process, were cited in the manuscript.

### **Table Legend**

**Table S1. Prospective studies adjusting for fat, sodium and carbohydrate intake and dietary pattern**

**Table S2. Prospective studies adjusting for components of fat, sodium and carbohydrates**

**Table S3. Prospective studies adjusting for other dietary components**

**Table S1. Prospective studies adjusting for lipids, sodium, carbohydrates and dietary pattern**

| Author, Year  | Outcome                      | Method of analysis         | Dietary adjustment                                                     | Effect estimate (95%CI) |
|---------------|------------------------------|----------------------------|------------------------------------------------------------------------|-------------------------|
| Fiolet 2018   | All cancers                  | HR per 10% increase in UPF | Lipids, sodium, carbohydrates and Western dietary pattern              | 1.13 (1.07,1.18)        |
|               | Breast cancer                | HR per 10% increase in UPF | Lipids, sodium, carbohydrates and Western dietary pattern              | 1.11 (1.01,1.21)        |
|               | Prostate cancer              | HR per 10% increase in UPF | Lipids, sodium, carbohydrates and Western dietary pattern              | 0.98 (0.83,1.16)        |
|               | Colorectal cancer            | HR per 10% increase in UPF | Lipids, sodium, carbohydrates and Western dietary pattern              | 1.16 (0.95,1.42)        |
| Adjibade 2019 | Incident depressive symptoms | HR per 10% increase in UPF | Lipids, sodium, carbohydrates and healthy and Western dietary patterns | 1.22 (1.16,1.29)        |

HR, hazard ratio, CI, confidence interval.

**Table S2. Prospective studies adjusting for components of fat, sodium and carbohydrate intake**

| Author, Year        | Outcome                                     | Method of analysis                             | Dietary adjustment               | Effect estimate (95%CI)                  |
|---------------------|---------------------------------------------|------------------------------------------------|----------------------------------|------------------------------------------|
| Rico-Campa 2019     | All-cause mortality                         | HR 1 <sup>st</sup> vs 4 <sup>th</sup> quartile | Sodium intake                    | 1.57 (1.09,2.26)                         |
| Li 2021             | Overweight/obesity                          | OR none vs ≥50g/day                            | Fat intake                       | 1.71 (1.44,2.03) <sup>1</sup>            |
|                     | Central obesity                             | OR none vs ≥50g/day                            | Fat intake                       | 1.90 (1.64,2.19) <sup>1</sup>            |
| Llavero-Valero 2021 | T2DM                                        | HR 1 <sup>st</sup> vs 3 <sup>rd</sup> tertile  | Added sugar and saccharin intake | 1.52 (1.05,2.21)                         |
| Scaranni 2021       | Incidence of Hypertension                   | OR 1 <sup>st</sup> vs 3 <sup>rd</sup> tertile  | Sodium intake                    | 1.23 (1.06,1.44) <sup>2</sup>            |
|                     | Incidence of Hypertension                   | OR 1 <sup>st</sup> vs 3 <sup>rd</sup> tertile  | SFA                              | 1.25 (1.07,1.47) <sup>2</sup>            |
|                     | Change in SBP (mmHg)                        | Beta per 1% increase in UPF intake             | Sodium intake                    | -0.54 (-1.23,0.15) <sup>2</sup>          |
|                     | Change in DBP (mmHg)                        | Beta per 1% increase in UPF intake             | Sodium intake                    | 0.08 (-0.39,0.56) <sup>2</sup>           |
| Rohatgi 2017        | Gestational weight gain (kg)                | Beta per 1% increase in UPF intake             | Fat intake                       | 1.30 (0.30,2.40) <sup>3</sup>            |
|                     | Neonate thigh skinfold thickness (mm)       | Beta per 1% increase in UPF intake             | Fat intake                       | 0.20 (0.005,0.40) <sup>3</sup>           |
|                     | Neonate subscapular skinfold thickness (mm) | Beta per 1% increase in UPF intake             | Fat intake                       | 0.10 (0.02,0.30) <sup>3</sup>            |
|                     | Neonate body fat percentage (%)             | Beta per 1% increase in UPF intake             | Fat intake                       | 0.60 (0.04,1.20) <sup>3</sup>            |
| Leone 2021          | Gestational diabetes pooled                 | OR 1 <sup>st</sup> vs 3 <sup>rd</sup> tertile  | SFA and carbohydrate intake      | 1.09 (0.72,1.64)                         |
|                     | Gestational diabetes <30                    | OR 1 <sup>st</sup> vs 3 <sup>rd</sup> tertile  | SFA and carbohydrate intake      | 0.87 (0.52,1.45)                         |
|                     | Gestational diabetes ≥30                    | OR 1 <sup>st</sup> vs 3 <sup>rd</sup> tertile  | SFA and carbohydrate intake      | 2.16 (1.06, 4.42)                        |
| Leffa 2020          | Total cholesterol at age 6                  | Beta per 10% increase in UPF intake at age 3   | Total fat intake at 3 years      | 0.07 (0.00,0.14) <sup>4</sup><br>p=0.046 |
|                     | LDL-cholesterol at age 6                    | Beta per 10% increase in UPF intake at age 3   | Total fat intake at 3 years      | 0.03 (-0.03,0.09) <sup>4</sup>           |
|                     | HDL-cholesterol at age 6                    | Beta per 10% increase in UPF intake at age 3   | Total fat intake at 3 years      | 0.01 (-0.02,0.05) <sup>4</sup>           |
|                     | TAG at age 6                                | Beta per 10% increase in UPF intake at age 3   | Total fat intake at 3 years      | 0.04 (0.01,0.07) <sup>4</sup>            |
| Donat-Vargas 2021   | Incident hypertriglyceridemia (≥150 mg/dL)  | OR 1 <sup>st</sup> vs 3 <sup>rd</sup> tertile  | SFA                              | 2.74 (1.23,6.10) <sup>5</sup>            |

|                                                        |                                               |             |                               |
|--------------------------------------------------------|-----------------------------------------------|-------------|-------------------------------|
| Incident hypertriglyceridemia (≥150 mg/dL)             | OR 1 <sup>st</sup> vs 3 <sup>rd</sup> tertile | TFA         | 2.63 (1.19,5.84) <sup>5</sup> |
| Incident hypertriglyceridemia (≥150 mg/dL)             | OR 1 <sup>st</sup> vs 3 <sup>rd</sup> tertile | Free sugars | 2.67 (1.13,6.27) <sup>5</sup> |
| Low HDL-cholesterol (<40 in men or <50 mg/dL in women) | OR 1 <sup>st</sup> vs 3 <sup>rd</sup> tertile | SFA         | 2.23 (1.23,4.06) <sup>5</sup> |
| Low HDL-cholesterol (<40 in men or <50 mg/dL in women) | OR 1 <sup>st</sup> vs 3 <sup>rd</sup> tertile | TFA         | 2.23 (1.22,4.05) <sup>5</sup> |
| Low HDL-cholesterol (<40 in men or <50 mg/dL in women) | OR 1 <sup>st</sup> vs 3 <sup>rd</sup> tertile | Free sugars | 2.36 (1.28,4.36) <sup>5</sup> |
| High LDL-cholesterol (>129 mg/dL)                      | OR 1 <sup>st</sup> vs 3 <sup>rd</sup> tertile | SFA         | 0.97 (0.40,2.34) <sup>5</sup> |
| High LDL-cholesterol (>129 mg/dL)                      | OR 1 <sup>st</sup> vs 3 <sup>rd</sup> tertile | TFA         | 1.03 (0.43,2.48) <sup>5</sup> |
| High LDL-cholesterol (>129 mg/dL)                      | OR 1 <sup>st</sup> vs 3 <sup>rd</sup> tertile | Free sugars | 0.92 (0.35,2.41) <sup>5</sup> |

OR, odds ratio; HR, hazard ratio; RR, relative risk; CVD, cardiovascular disease; IHD, ischemic heart disease; BMI, body mass index; T2DM, type 2 diabetes mellitus; UPF, ultra-processed food; SBP, systolic blood pressure; DBP, diastolic blood pressure; SFA, saturated fatty acids; TFA, trans fatty acids; LDL, low-density lipoprotein; HDL, high-density lipoprotein; TAG, triacylglycerol;

1. Also further adjusted for income, education, urbanization, alcohol drinking, smoking, and physical activity.
2. Also further adjusted for physical activity, smoking, alcohol consumption and total daily energy intake.
3. Also further adjusted for maternal age, age\*UPF interaction, race, socioeconomic status, weight status, weight status\*UPF interaction, average daily energy intake, and duration of moderate physical activity.
4. Also further adjusted for total energy intake at 3 years.
5. Also further adjusted for total energy intake, educational level, marital status, smoking status, BMI, physical activity, alcohol consumption, number of medications, number of chronic conditions, fibre intake and unprocessed and minimally processed food intake.

**Table S3. Prospective studies adjusting for other dietary components**

| Author, Year    | Outcome                                              | Method of analysis                             | Dietary adjustment                                            | Effect estimate (95%CI)     |
|-----------------|------------------------------------------------------|------------------------------------------------|---------------------------------------------------------------|-----------------------------|
| Rico-Campa 2019 | All-cause mortality                                  | HR 1 <sup>st</sup> vs 4 <sup>th</sup> quartile | All fried foods                                               | 1.59 (1.12,2.27)            |
|                 | All-cause mortality                                  | HR 1 <sup>st</sup> vs 4 <sup>th</sup> quartile | Coffee and quadratic alcohol term                             | 1.57 (1.10, 2.24)           |
| Kim 2019        | All-cause mortality                                  | P-trend only                                   | Excluding bacon, sausage, and processed meats from UPF intake | P-trend = 0.02 <sup>1</sup> |
|                 | CVD mortality                                        | P-trend only                                   | Excluding bacon, sausage, and processed meats from UPF intake | P-trend = 0.45 <sup>1</sup> |
| Beslay 2020     | BMI change                                           | Beta per 10% increase in UPF                   | Fruit and vegetables and sugary drinks                        | 0.02 (0.01,0.02)            |
|                 | Overweight                                           | HR per 10% increase in UPF                     | Fruit and vegetables and sugary drinks                        | 1.10 (1.07,1.13)            |
|                 | Obesity                                              | HR per 10% increase in UPF                     | Fruit and vegetables and sugary drinks                        | 1.10 (1.05,1.14)            |
| Mendonca 2016   | Incident overweight/obesity                          | HR quartiles 1 vs 4                            | Fruit and vegetables                                          | 1.26 (1.10,1.45)            |
| Konieczna 2021  | Total fat mass (z-score)                             | Beta per 10% increase in UPF                   | Change in fruit and vegetable intake                          | 0.08 (0.04,0.11)            |
|                 | Visceral fat mass (z-score)                          | Beta per 10% increase in UPF                   | Change in fruit and vegetable intake                          | 0.08 (0.04,0.13)            |
|                 | Android:gynoid fat ratio (z-score)                   | Beta per 10% increase in UPF                   | Change in fruit and vegetable intake                          | 0.04 (0.00,0.08)            |
| Cordova 2021    | Weight gain                                          | Beta per 1SD increase in UPF/day               | UPF soft drink subgroup                                       | 0.075 (0.024,0.126)         |
| Canhada 2020    | Large weight gain: (≥90th percentile: ≥1.68 kg/year) | RR 1 <sup>st</sup> vs 4 <sup>th</sup> quartile | Excluding sweetened beverages from UPF classification         | 1.34 (1.13,1.58)            |
|                 | Large WC gain: (≥90th percentile: ≥2.42 cm/year)     | RR 1 <sup>st</sup> vs 4 <sup>th</sup> quartile | Excluding sweetened beverages from UPF classification         | 1.42 (1.20,1.69)            |
|                 | Incident overweight/obesity                          | RR 1 <sup>st</sup> vs 4 <sup>th</sup> quartile | Excluding sweetened beverages from UPF classification         | 1.24 (1.06,1.44)            |
|                 | Incident obesity                                     | RR 1 <sup>st</sup> vs 4 <sup>th</sup> quartile | Excluding sweetened beverages from UPF classification         | 1.03 (0.87,1.22)            |
|                 | Large weight gain: (≥90th percentile: ≥1.68 kg/year) | RR 1 <sup>st</sup> vs 4 <sup>th</sup> quartile | Fruit and vegetables                                          | 1.33 (1.11,1.58)            |
|                 | Large WC gain: (≥90th percentile: ≥2.42 cm/year)     | RR 1 <sup>st</sup> vs 4 <sup>th</sup> quartile | Fruit and vegetables                                          | 1.38 (1.16,1.64)            |
|                 | Incident overweight/obesity                          | RR 1 <sup>st</sup> vs 4 <sup>th</sup> quartile | Fruit and vegetables                                          | 1.22 (1.04,1.42)            |
|                 | Incident obesity                                     | RR 1 <sup>st</sup> vs 4 <sup>th</sup> quartile | Fruit and vegetables                                          | 1.01 (0.85,1.21)            |

|                   |                                                        |                                                  |                                                    |                                        |
|-------------------|--------------------------------------------------------|--------------------------------------------------|----------------------------------------------------|----------------------------------------|
| Mendonca 2017     | Hypertension                                           | HR 1 <sup>st</sup> vs 3 <sup>rd</sup> tertile    | Olive oil, fruit and vegetables and sodium intake  | 1.22 (1.07,1.38)                       |
| Monge 2021        | Incident hypertension                                  | ≤20% vs >45% of energy from all UPFs             | Multivitamin intake                                | 0.98 (0.84,1.14) <sup>2</sup>          |
|                   | Incident hypertension                                  | ≤20% vs >45% of energy from liquid UPF           | Multivitamin intake                                | 1.34 (1.10,1.65) <sup>2</sup>          |
|                   | Incident hypertension                                  | ≤20% vs >45% of energy from solid UPF            | Multivitamin intake                                | 0.91 (0.82,1.01) <sup>2</sup>          |
| Zhang 2021        | NAFLD                                                  | HR 1 <sup>st</sup> vs 4 <sup>th</sup> quartile   | Excluding UPF bread and fruit and vegetable drinks | 1.24 (1.13,1.37)                       |
| Rey-Garcia 2021   | Renal function                                         | OR 1 <sup>st</sup> vs 3 <sup>rd</sup> tertile    | Fibre intake                                       | 1.69 (1.11,2.55) <sup>3</sup>          |
| Chang 2021        | BMI (kg/m <sup>2</sup> ) /year                         | Beta 1 <sup>st</sup> vs 5 <sup>th</sup> quintile | Fruit and vegetables                               | 0.06 (0.04,0.08)                       |
|                   | Fat mass index (kg/m <sup>2</sup> ) /year              | Beta 1 <sup>st</sup> vs 5 <sup>th</sup> quintile | Fruit and vegetables                               | 0.03 (0.01,0.05)                       |
|                   | Lean mass index (kg/m <sup>2</sup> ) /year             | Beta 1 <sup>st</sup> vs 5 <sup>th</sup> quintile | Fruit and vegetables                               | 0.004 (-0.007,0.010)                   |
|                   | Body fat percentage (%) /year                          | Beta 1 <sup>st</sup> vs 5 <sup>th</sup> quintile | Fruit and vegetables                               | 0.004 (-0.05,0.06)                     |
| Donat-Vargas 2021 | Incident hypertriglyceridemia (≥150 mg/dL)             | OR 1 <sup>st</sup> vs 3 <sup>rd</sup> tertile    | Fibre intake                                       | 2.21 (1.09,4.49) <sup>4</sup>          |
|                   | Low HDL-cholesterol (<40 in men or <50 mg/dL in women) | OR 1 <sup>st</sup> vs 3 <sup>rd</sup> tertile    | Fibre intake                                       | 2.04 (1.18,3.53) <sup>4</sup>          |
|                   | High LDL-cholesterol (>129 mg/dL)                      | OR 1 <sup>st</sup> vs 3 <sup>rd</sup> tertile    | Fibre intake                                       | 1.13 (0.52,2.46) <sup>4</sup>          |
|                   | Δtriglycerides (mg/dL)                                 | Beta 1 <sup>st</sup> vs 3 <sup>rd</sup> tertile  | Fibre intake                                       | 6.23 (1.26,11.21) <sup>4</sup>         |
|                   | ΔHDL cholesterol (mg/dL)                               | Beta 1 <sup>st</sup> vs 3 <sup>rd</sup> tertile  | Fibre intake                                       | 0.02 (-1.45,1.49) <sup>4</sup>         |
|                   | ΔLDL cholesterol (mg/dL)                               | Beta 1 <sup>st</sup> vs 3 <sup>rd</sup> tertile  | Fibre intake                                       | -3.43 (-8.60,1.74) <sup>4</sup>        |
| Zhang 2021        | Change in grip strength (kg/year)                      | Beta per 10% increase in UPF                     | Excluding UPF bread and fruit and vegetable drinks | -0.3214 (-0.6186,-0.0242) <sup>5</sup> |
|                   | Change in weight-adjusted grip strength (kg/kg/year)   | Beta per 10% increase in UPF                     | Excluding UPF bread and fruit and vegetable drinks | -0.0046 (-0.0088,-0.0003) <sup>5</sup> |

OR, odds ratio; HR, hazard ratio; RR, relative risk; CVD, cardiovascular disease; IHD, ischemic heart disease; BMI, body mass index; T2DM, type 2 diabetes mellitus; UPF, ultra-processed food; SBP, systolic blood pressure; DBP, diastolic blood pressure; TEI, total energy intake

1. Also further adjusted for body mass index, hypertension status, total cholesterol, and estimated glomerular filtration rate.
2. Also further adjusted for energy intake.
3. Also further adjusted for education level, smoking status, former-drinker status, physical activity and time spent watching TV.
4. Also further adjusted for total energy intake, educational level, marital status, smoking status, BMI, physical activity, alcohol consumption, number of medications and number of chronic conditions.

5. *Also further adjusted for smoking status, alcohol drinking status, education level, employment, monthly household income, physical activity, family history of disease (including CVD, hypertension, hyperlipidaemia, and diabetes), depressive symptoms, hypertension, hyperlipidaemia, diabetes, total energy intake, healthy diet score, dietary supplement use, total protein intake and milk intake.*
